# Supplementary material for: Stereoselective synthesis of different cyclic tetrasiloxane isomers depending on the superacid catalyst employed
Source: Royal Society of Chemistry journal article supplement (doi:10.1039/d4dt00062e), 2024-01-01
Supplement: d4dt00062e1.pdf [file d4dt00062e1.pdf]

Electronic Supplementary Information  
for

**Stereoselective synthesis of different cyclic tetrasiloxane isomers  
depending on the superacid catalyst employed**

Kanako Sonoda,<sup>a</sup> Norimitsu Tohnai<sup>b</sup> and Yoshiro Kaneko<sup>\*a</sup>

<sup>a</sup> Graduate School of Science and Engineering, Kagoshima University, 1-21-40, Korimoto,  
Kagoshima 890-0065, Japan

<sup>b</sup> Graduate School of Engineering, Osaka University, 2-1, Yamadaoka, Suita, Osaka 565-0871, Japan

\*Correspondence Addresses (E-mail): [ykaneko@eng.kagoshima-u.ac.jp](mailto:ykaneko@eng.kagoshima-u.ac.jp)

**Table S1** Crystal Data, Data Collection, and Structure Refinement of Boc-CyTS-NNf<sub>2</sub> and Boc-CyTS-NHf<sub>2</sub>

|                                                    | Boc-CyTS-NNf <sub>2</sub>                                                      | Boc-CyTS-NHf <sub>2</sub>                                                      |
|----------------------------------------------------|--------------------------------------------------------------------------------|--------------------------------------------------------------------------------|
| chemical formula                                   | C <sub>36</sub> H <sub>76</sub> N <sub>4</sub> O <sub>12</sub> Si <sub>4</sub> | C <sub>36</sub> H <sub>76</sub> N <sub>4</sub> O <sub>12</sub> Si <sub>4</sub> |
| formula weight                                     | 869.36                                                                         | 869.36                                                                         |
| crystal system                                     | monoclinic                                                                     | monoclinic                                                                     |
| space group                                        | <i>P2<sub>1</sub>/n</i> (No. 14)                                               | <i>P2<sub>1</sub>/c</i> (No. 14)                                               |
| <i>a</i> (Å)                                       | 9.6119(2)                                                                      | 17.2917(2)                                                                     |
| <i>b</i> (Å)                                       | 22.4858(4)                                                                     | 14.8352(2)                                                                     |
| <i>c</i> (Å)                                       | 23.6228(4)                                                                     | 9.99670(10)                                                                    |
| $\beta$ (deg)                                      | 95.304(2)                                                                      | 91.5930(10)                                                                    |
| <i>V</i> (Å <sup>3</sup> )                         | 5083.76(16)                                                                    | 2563.42(5)                                                                     |
| <i>D</i> <sub>calc</sub> (g cm <sup>-3</sup> )     | 1.136                                                                          | 1.126                                                                          |
| <i>Z</i>                                           | 4                                                                              | 4                                                                              |
| <i>F</i> (000)                                     | 1888                                                                           | 944                                                                            |
| $\mu$ (Mo K $\alpha$ ) (cm <sup>-1</sup> )         | 1.535                                                                          | 1.522                                                                          |
| <i>T</i> (°C)                                      | -60                                                                            | -60                                                                            |
| no. of measured reflections                        | 30731                                                                          | 14591                                                                          |
| no. of unique reflections                          | 10101                                                                          | 5051                                                                           |
| <i>R</i> <sub>int</sub>                            | 0.0305                                                                         | 0.0324                                                                         |
| <i>R1</i> <sup>a</sup> ( <i>wR2</i> <sup>b</sup> ) | 0.0557 (0.1297)                                                                | 0.0551 (0.1342)                                                                |
| CCDC                                               | 2307476                                                                        | 2307477                                                                        |

<sup>a</sup> $R1 = \Sigma||F_o| - |F_c|| / \Sigma|F_o|$ . <sup>b</sup> $wR2 = [\Sigma(w(F_o^2 - F_c^2)^2) / \Sigma w(F_o^2)^2]^{1/2}$ .

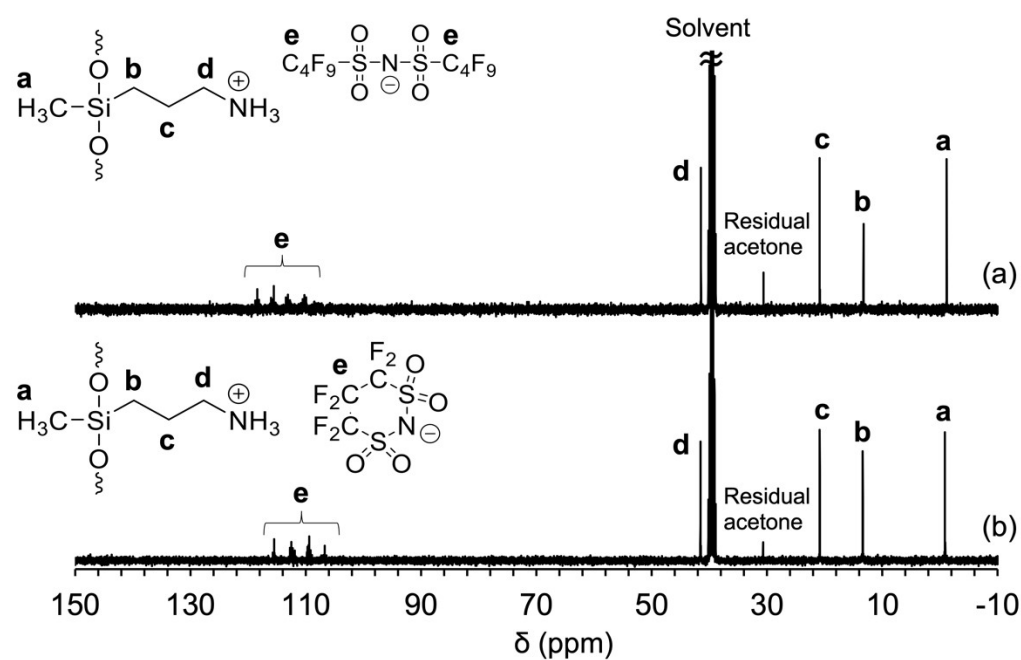

**Fig. S1**  $^{13}\text{C}$  NMR spectra of (a) Am-CyTS-NNf<sub>2</sub> and (b) Am-CyTS-NHf<sub>2</sub> in DMSO-*d*<sub>6</sub>. Chemical shifts were referenced to DMSO-*d*<sub>6</sub> ( $\delta$  39.7).

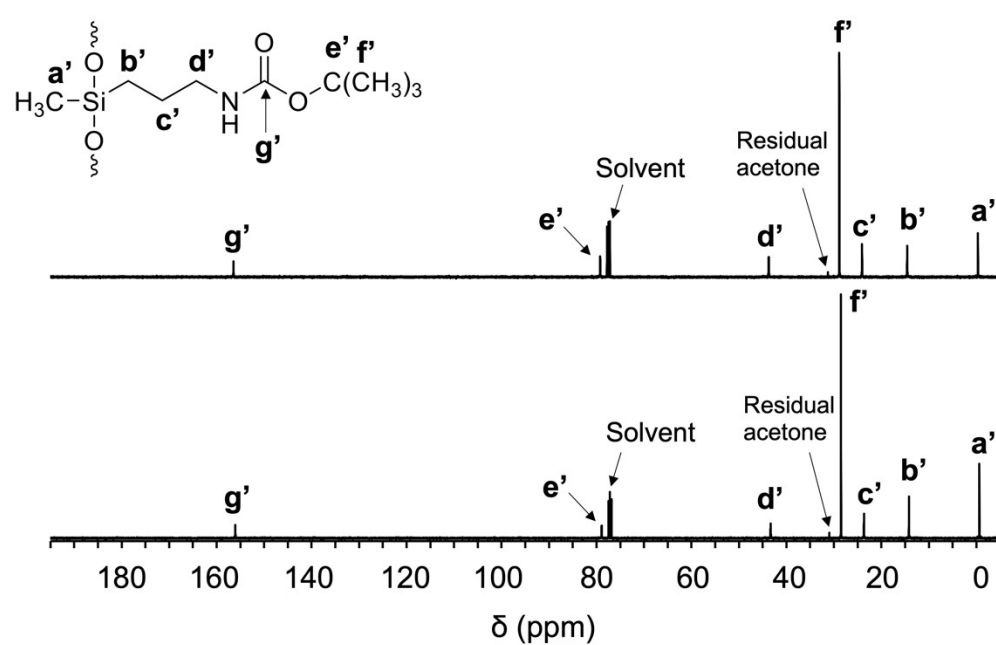

**Fig. S2**  $^{13}\text{C}$  NMR spectra of (a) Boc-CyTS-NNf<sub>2</sub> and (b) Boc-CyTS-NHf<sub>2</sub> in CDCl<sub>3</sub>. Chemical shifts were referenced to CDCl<sub>3</sub> ( $\delta$  77.0).

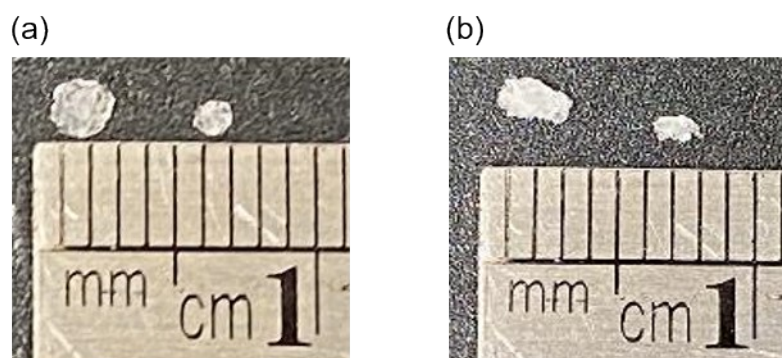

**Fig. S3** Photographs of the single crystals of (a) Boc-CyTS-NNf<sub>2</sub> and (b) Boc-CyTS-NHf<sub>2</sub>.

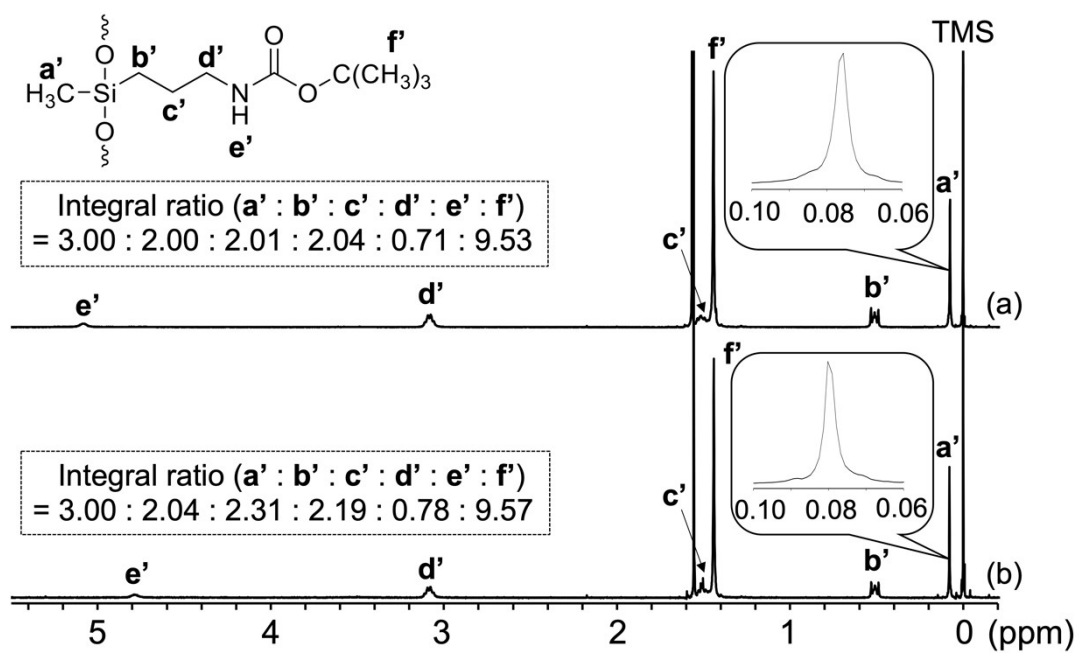

**Fig. S4** <sup>1</sup>H NMR spectra of the recrystallized (a) Boc-CyTS-NNf<sub>2</sub> and (b) Boc-CyTS-NHf<sub>2</sub> in CDCl<sub>3</sub>. Chemical shifts were referenced to TMS (δ 0.0).
